# Supplementary material
Source: Springer Nature journal article supplement (https://www.springermedizin.de/resource/supplementary/13063_2010_534_MOESM5_ESM.pdf/9618180)
Supplement: MOESM5 [file 9618180]

# Engagement

## Therapeutic relationship

- relaxed atmosphere
- humor
- empathy
- limited self-disclosure of the therapist
- affirmation
- respect regarding patients' autonomy

## Assessment and shared formulation

## Treatment plan

### Topics

- Work
- School
- Living situation
- Hobbies
- Friends
- Family
- Physical health
- Financial situation
- Grooming
- Every-day duties
- Neighborhood

### Strategies

- Enhancement of self-esteem
- Activation of external resources
- Counseling & instruction
- Implicit problem solving
- Structuring
